# Supplementary material
Source: Springer Nature journal article supplement (https://www.springermedizin.de/resource/supplementary/12879_2005_336_MOESM1_ESM.pdf/9448802)

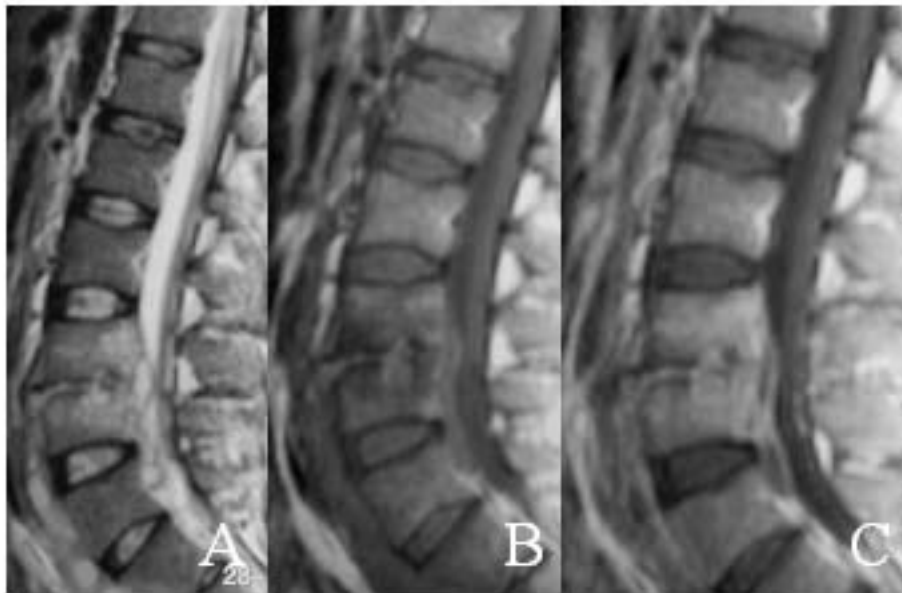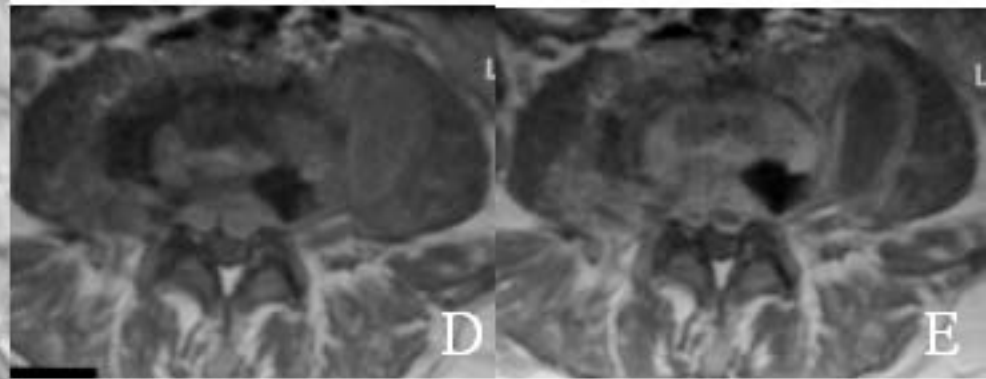

Supplement: MOESM1 [file 9448802]
